# Supplementary material
Source: PubMed Central journal article supplement (PMC7042090)

Diagnosis T2/FLAIR MRI

Standard 1-cm CTV margin (n = 60)

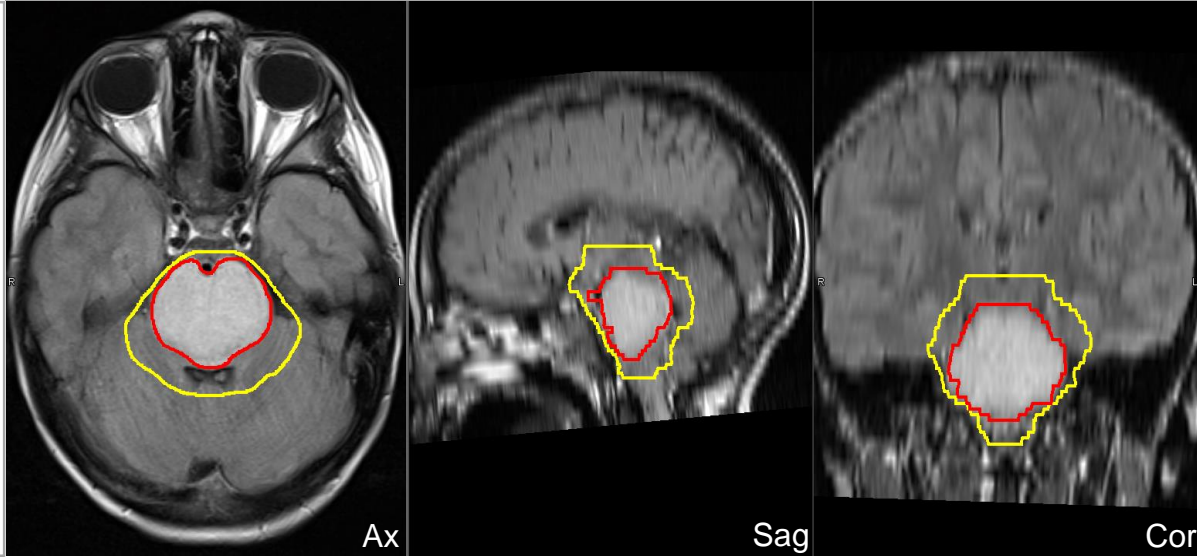

Extended 2–3-cm CTV margin (n = 45)

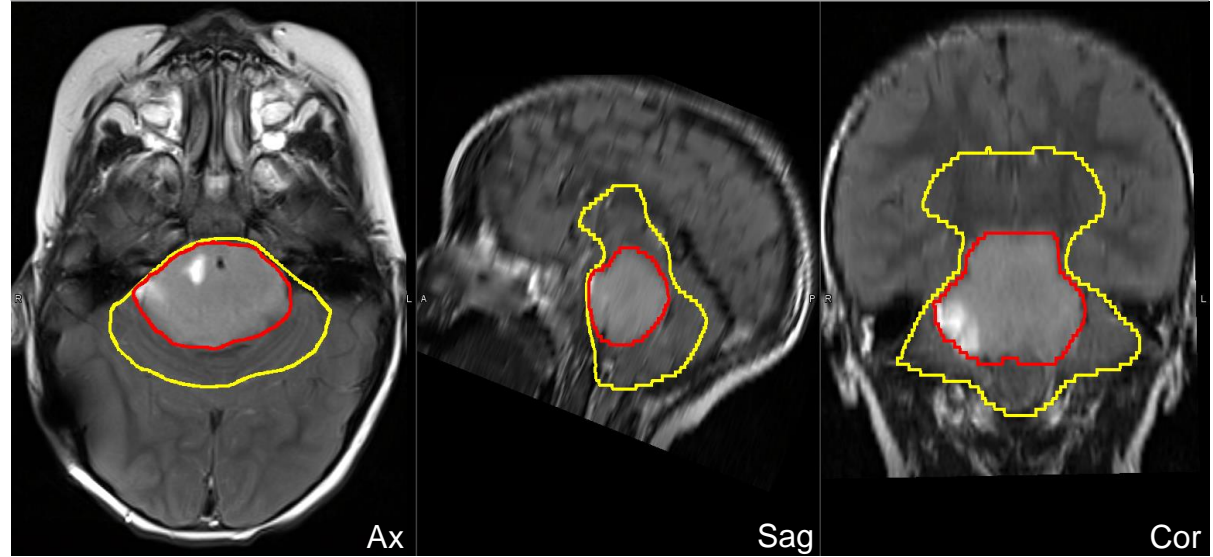

Supplement: NIHMS1544698-supplement-1.pdf [file NIHMS1544698-supplement-1.pdf]

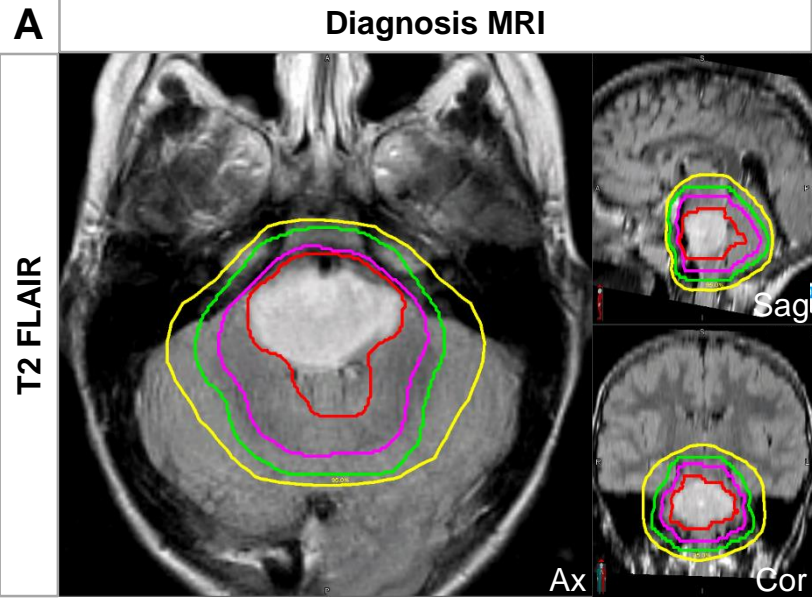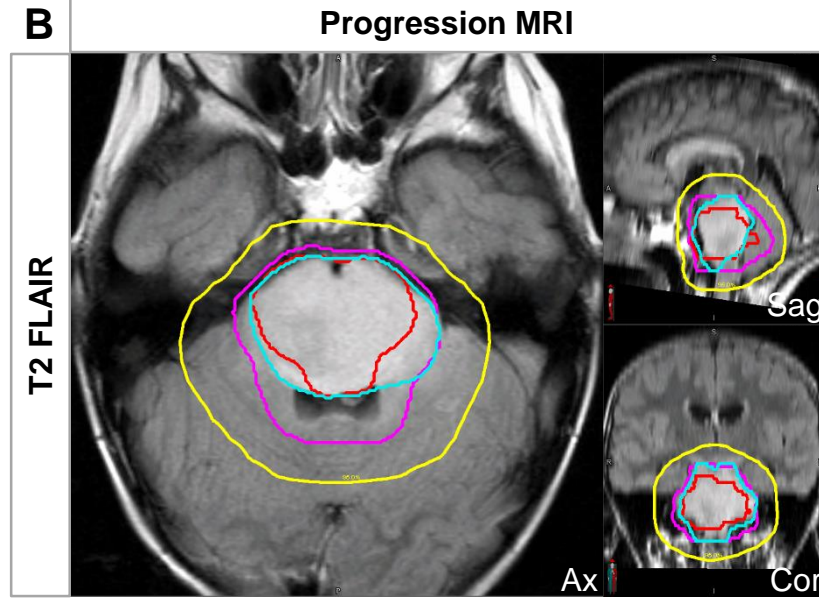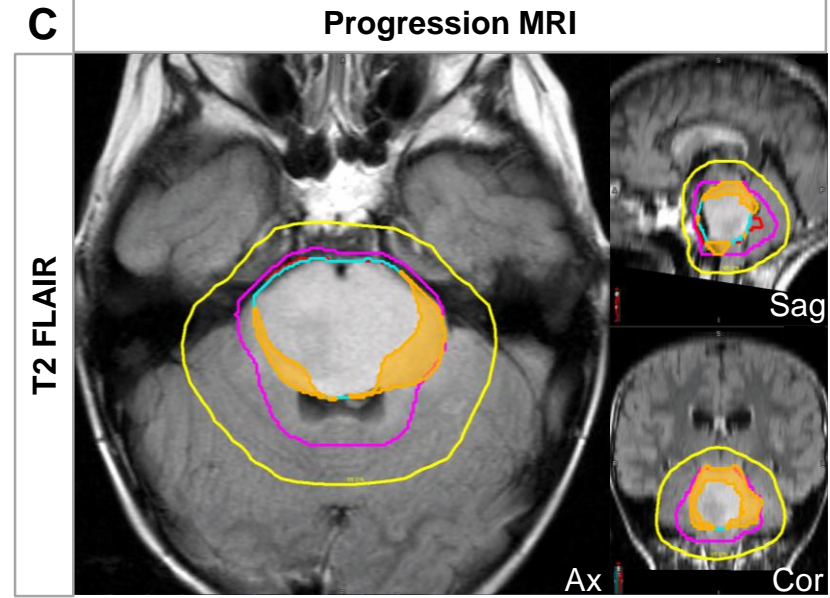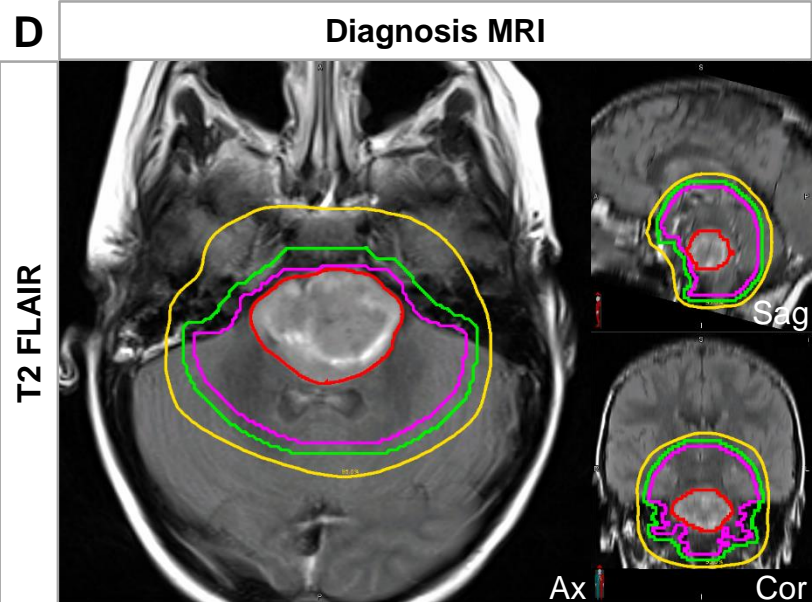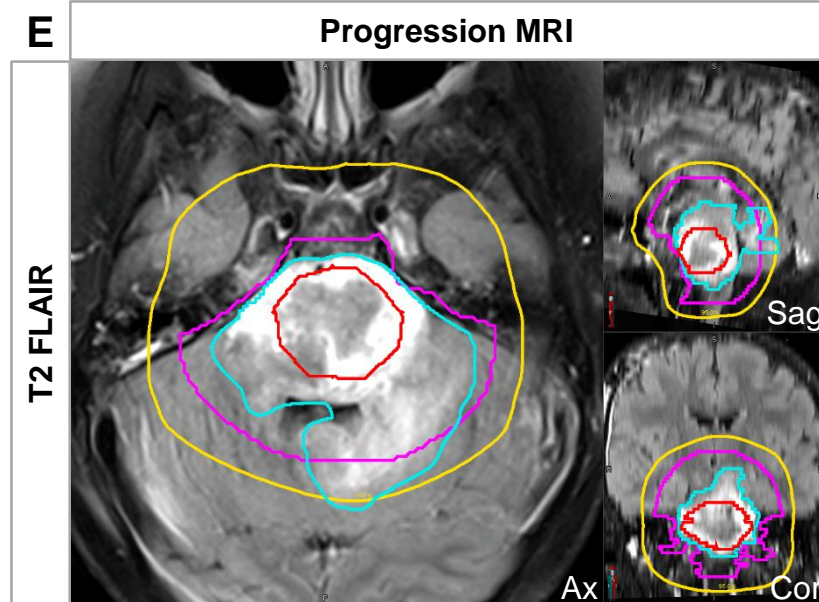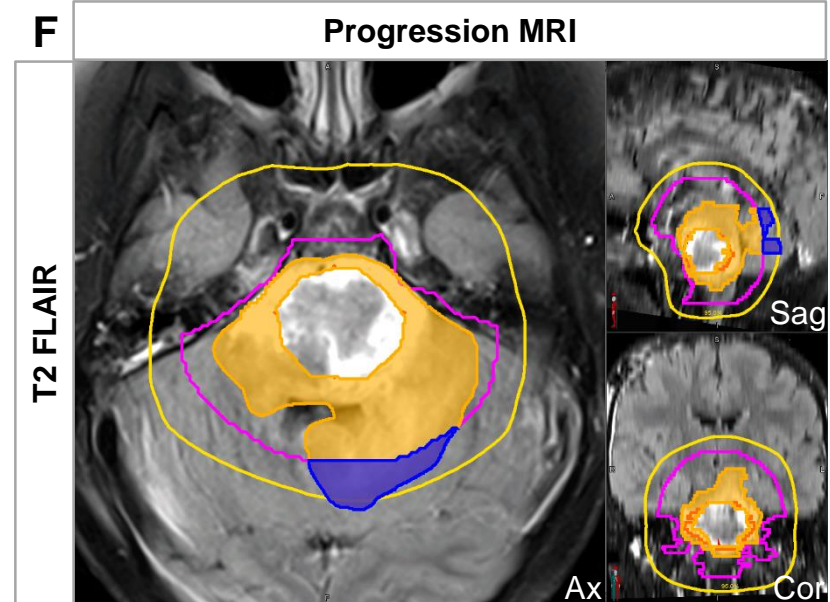

Supplement: NIHMS1544698-supplement-2.pdf [file NIHMS1544698-supplement-2.pdf]
